# Supplementary material
Source: PubMed Central journal article supplement (PMC2711412)
Supplement: mmc1.pdf [file mmc1.pdf]

Biophysical Journal, Volume 96

**Supporting Material**

**A free-energy approach for all-atom protein simulation**

Abhinav Verma and Wolfgang Wenzel

## PFF02: An Overview

All atom force field (except apolar CH<sub>n</sub> groups)

No vibration terms

All bond lengths and peptide planes are kept fixed

Dihedral angles of main chain and side chain rotate

### *Protein Model*

The atoms in the polypeptide chain are classified according to their chemical characteristics and are then used to obtain different force field parameters.

| Residue/<br>Chain Part    | Atom<br>Type | Potential<br>Type | Group<br>Type | Index<br>( $\rho$ ) | Charge<br>( $\varphi$ ) |
|---------------------------|--------------|-------------------|---------------|---------------------|-------------------------|
| main chain,<br>N-terminus | NT           | n3                | NTM           | 7                   |                         |
|                           | HEN1         | h3                | NTM           | 7                   |                         |
|                           | HEN2         | h3                | NTM           | 7                   |                         |
|                           | HEN3         | h3                | NTM           | 7                   |                         |
|                           | CA           | cb                | NTM           | 7                   |                         |
|                           | C            | cd                | CO            | 2                   | +0.38                   |
|                           | O            | odd               | CO            | 2                   | -0.38                   |
| main chain                | N            | n                 | NH            | 1                   | -0.28                   |
|                           | HN           | hn                | NH            | 1                   | +0.28                   |
|                           | CA           | caa               | CA            | 7                   |                         |
|                           | C            | cd                | CO            | 2                   | +0.38                   |
|                           | O            | odd               | CO            | 2                   | -0.38                   |
| main chain,<br>C-terminus | N            | n                 | NH            | 1                   | -0.28                   |
|                           | HN           | hn                | NH            | 1                   | +0.28                   |
|                           | CA           | caa               | END           | 7                   |                         |
|                           | C            | cd                | END           | 7                   |                         |
|                           | O            | odd               | END           | 7                   |                         |
|                           | OT           | o-                | END           | 7                   |                         |
| ALA                       | CB           | cme               | CB            | 7                   |                         |
| ASP                       | CB           | cme               | ASP           | 6                   | -0.20                   |

| Residue/<br>Chain Part | Atom<br>Type | Potential<br>Type | Group<br>Type | Index<br>( $\rho$ ) | Charge<br>( $q$ ) |
|------------------------|--------------|-------------------|---------------|---------------------|-------------------|
| ASP                    | CG           | c-                | ASP           | 6                   | +0.34             |
| ASP                    | OD1          | o-                | ASP           | 6                   | -0.57             |
| ASP                    | OD2          | o-                | ASP           | 6                   | -0.57             |
| ASN                    | CB           | cme               | CB            | 7                   |                   |
| ASN                    | CG           | c-                | COG           | 5                   | +0.38             |
| ASN                    | OD1          | od                | COG           | 5                   | -0.38             |
| ASN                    | ND2          | n2                | ND2           | 4                   | -0.56             |
| ASN                    | HNA          | h2                | ND2           | 4                   | +0.28             |
| ASN                    | HNB          | h2                | ND2           | 4                   | +0.28             |
| ARG                    | CB           | cme               | CB            | 7                   |                   |
| ARG                    | CG           | cme               | CG            | 7                   |                   |
| ARG                    | CD           | cme               | ARG           | 6                   | +0.19             |
| ARG                    | NE           | na                | ARG           | 6                   | -0.50             |
| ARG                    | HNE          | h1                | ARG           | 6                   | +0.37             |
| ARG                    | CZ           | cb                | ARG           | 6                   | +0.46             |
| ARG                    | NH1          | n+                | ARG           | 6                   | -0.50             |
| ARG                    | NH2          | n+                | ARG           | 6                   | -0.50             |
| ARG                    | HHA          | h+                | ARG           | 6                   | +0.37             |
| ARG                    | HHB          | h+                | ARG           | 6                   | +0.37             |
| ARG                    | HHC          | h+                | ARG           | 6                   | +0.37             |
| ARG                    | HHD          | h+                | ARG           | 6                   | +0.37             |
| CYS                    | CB           | cme               | CB            | 7                   |                   |
| CYS                    | SG           | s                 | SG            | 7                   |                   |
| GLU                    | CB           | cme               | CB            | 7                   |                   |
| GLU                    | CG           | cme               | GLU           | 6                   | -0.20             |
| GLU                    | CD           | c-                | GLU           | 6                   | +0.34             |
| GLU                    | OE1          | o-                | GLU           | 6                   | -0.57             |
| GLU                    | OE2          | o-                | GLU           | 6                   | -0.57             |
| GLN                    | CB           | cme               | CB            | 7                   |                   |
| GLN                    | CG           | cme               | CG            | 7                   |                   |
| GLN                    | CD           | c-                | COD           | 5                   | +0.38             |
| GLN                    | OE1          | od                | COD           | 5                   | -0.38             |

| Residue/<br>Chain Part | Atom<br>Type | Potential<br>Type | Group<br>Type | Index<br>( $\rho$ ) | Charge<br>( $q$ ) |
|------------------------|--------------|-------------------|---------------|---------------------|-------------------|
| GLN                    | NE2          | n2                | NE2           | 4                   | -0.56             |
| GLN                    | HNA          | h2                | NE2           | 4                   | +0.28             |
| GLN                    | HNB          | h2                | NE2           | 4                   | +0.28             |
| HIS                    | CB           | cme               | HIS           | 6                   | +0.11             |
| HIS                    | CG           | cr                | HIS           | 6                   | +0.17             |
| HIS                    | ND1          | n1                | HIS           | 6                   | -0.50             |
| HIS                    | HD1          | hp                | HIS           | 6                   | +0.37             |
| HIS                    | CD2          | cr                | HIS           | 6                   | +0.33             |
| HIS                    | CE1          | cr                | HIS           | 6                   | +0.65             |
| HIS                    | NE2          | n1                | HIS           | 6                   | -0.50             |
| HIS                    | HE2          | hp                | HIS           | 6                   | +0.37             |
| ILE                    | CB           | cme               | CB            | 7                   |                   |
| ILE                    | CG1          | cme               | CG1           | 7                   |                   |
| ILE                    | CG2          | cme               | CG2           | 7                   |                   |
| ILE                    | CD1          | cme               | CD1           | 7                   |                   |
| LEU                    | CB           | cme               | CB            | 7                   |                   |
| LEU                    | CG           | cme               | CG            | 7                   |                   |
| LEU                    | CD1          | cme               | CD1           | 7                   |                   |
| LEU                    | CD2          | cme               | CD2           | 7                   |                   |
| LYS                    | CB           | cme               | CB            | 7                   |                   |
| LYS                    | CG           | cme               | CG            | 7                   |                   |
| LYS                    | CD           | cme               | LYS           | 6                   | +0.12             |
| LYS                    | CE           | cb                | LYS           | 6                   | +0.30             |
| LYS                    | NZ           | n3                | LYS           | 6                   | -0.50             |
| LYS                    | HZA          | h3                | LYS           | 6                   | +0.36             |
| LYS                    | HZB          | h3                | LYS           | 6                   | +0.36             |
| LYS                    | HZC          | h3                | LYS           | 6                   | +0.36             |
| MET                    | CB           | cme               | CB            | 7                   |                   |
| MET                    | CG           | cme               | CG            | 7                   |                   |
| MET                    | SD           | s                 | SD            | 7                   |                   |
| MET                    | CE           | cme               | CE            | 7                   |                   |
| PHE                    | CB           | cme               | CB            | 7                   |                   |

| Residue/<br>Chain Part | Atom<br>Type | Potential<br>Type | Group<br>Type | Index<br>( $\rho$ ) | Charge<br>( $q$ ) |
|------------------------|--------------|-------------------|---------------|---------------------|-------------------|
| PHE                    | CG           | cr                | CG            | 7                   |                   |
| PHE                    | CD1          | cr                | CD1           | 7                   |                   |
| PHE                    | CD2          | cr                | CD2           | 7                   |                   |
| PHE                    | CE1          | cr                | CE1           | 7                   |                   |
| PHE                    | CE2          | cr                | CE2           | 7                   |                   |
| PHE                    | CZ           | cr                | CZ            | 7                   |                   |
| PRO<br>(main chain)    | N            | n                 | PRO           | 7                   |                   |
|                        | CA           | caa               | PRO           | 7                   |                   |
|                        | C            | cd                | CO            | 2                   | +0.38             |
|                        | O            | odd               | CO            | 2                   | -0.38             |
| PRO                    | CB           | cme               | CB            | 7                   |                   |
| PRO                    | CG           | cme               | CG            | 7                   |                   |
| PRO                    | CD           | cme               | PRO           | 7                   |                   |
| SER                    | CB           | cme               | OGS           | 3                   | +0.03             |
| SER                    | OG           | os                | OGS           | 3                   | -0.38             |
| SER                    | HOG          | hd                | OGS           | 3                   | +0.35             |
| THR                    | CB           | cme               | OGT           | 3                   | +0.03             |
| THR                    | OG1          | os                | OGT           | 3                   | -0.38             |
| THR                    | HOG          | hd                | OGT           | 3                   | +0.35             |
| THR                    | CG2          | cme               | CG2           | 7                   |                   |
| TRP                    | CB           | cme               | CB            | 7                   |                   |
| TRP                    | CG           | cr                | CG            | 7                   |                   |
| TRP                    | CD1          | cr                | CD1           | 7                   |                   |
| TRP                    | CD2          | cr                | CD2           | 7                   |                   |
| TRP                    | NE1          | nw                | NEH           | 6                   | -0.28             |
| TRP                    | HNE          | h1                | NEH           | 6                   | +0.28             |
| TRP                    | CE2          | cr                | CE2           | 7                   |                   |
| TRP                    | CE3          | cr                | CE3           | 7                   |                   |
| TRP                    | CZ2          | cr                | CZ2           | 7                   |                   |
| TRP                    | CZ3          | cr                | CZ3           | 7                   |                   |
| TRP                    | CH2          | cr                | CH2           | 7                   |                   |
| TYR                    | CB           | cme               | CB            | 7                   |                   |

| Residue/<br>Chain Part | Atom<br>Type | Potential<br>Type | Group<br>Type | Index<br>( $g$ ) | Charge<br>( $q$ ) |
|------------------------|--------------|-------------------|---------------|------------------|-------------------|
| TYR                    | CG           | cr                | CG            | 7                |                   |
| TYR                    | CD1          | cr                | CD1           | 7                |                   |
| TYR                    | CD2          | cr                | CD2           | 7                |                   |
| TYR                    | CE1          | cr                | CE1           | 7                |                   |
| TYR                    | CE2          | cr                | CE2           | 7                |                   |
| TYR                    | CZ           | cr                | OHH           | 3                | +0.03             |
| TYR                    | OH           | oy                | OHH           | 3                | -0.38             |
| TYR                    | HOH          | hd                | OHH           | 3                | +0.35             |
| VAL                    | CB           | cme               | CB            | 7                |                   |
| VAL                    | CG1          | cme               | CG1           | 7                |                   |
| VAL                    | CG2          | cme               | CG2           | 7                |                   |

Table 1. Types of atoms and groups for different residues. The meaning of the electrostatic parameters ( $g$  and  $q$ ) are explained below in the text.

## *Interaction Terms*

### 1. Lennard-Jones interaction

The van der Waals interactions are included in the force field as a Lennard-Jones 6-12 potential:

$$V_{\text{L}}(r_{ij}) = V_{\text{L}}^{(0)} \left[ \left( \frac{R_{ij}}{r_{ij}} \right)^{12} - 2 \left( \frac{R_{ij}}{r_{ij}} \right)^6 \right]$$

with further renormalization

$$V_{\text{L}}(r_{ij}) = \frac{C}{(C + V_{\text{L}}^{(0)}) / V_{\text{L}}(r_{ij}) + 1}$$

Here  $i, j$  represent the atoms included in the force field,  $r_{ij}$  is the distance between these atoms and  $R_{ij}$  is the Lennard-Jones radius  $R_{ij} = \sqrt{R_i R_j}$ ;  $V_{\text{L}}^{(0)} = 0.01$  kcal/mole;  $C = 30$  kcal/mole. The parameters for the Lennard-Jones potential were derived from a potential of mean force approach to experimental data by fitting short range (2Å-5Å) radial distributions to a set of 138 proteins which represent a wide span

of different protein folds.

| Potential Type    | $R_{ij}$ , Å | $\sigma_j$ , cal/mol Å <sup>2</sup> |
|-------------------|--------------|-------------------------------------|
| CAA               | 4.10         | +60                                 |
| CME               | 4.10         | +84                                 |
| CR                | 3.49         | +93                                 |
| CB C-             | 4.10         | -6                                  |
| CD                | 4.10         | +15                                 |
| N N1 NW NA N+     | 3.55         | -30                                 |
| N2                | 3.55         | +15                                 |
| N3                | 3.55         | -45                                 |
| OS OY ODD         | 3.10         | -30                                 |
| O- OD             | 3.10         | -15                                 |
| S                 | 3.80         | +84                                 |
| H1 H2 H3 H+ HD HP | 1.95         | as by bound partner                 |
| HN                | 2.15         | as by bound partner                 |

Table 2: Lennard-Jones radii and the solvation enthalpies for different potential types.

## 2. Electrostatics

The electrostatics is included using Coulomb potential. This interaction can be further splitted into main chain and side chain contributions. The dielectric constants used here are group-specific dielectric constants. The interaction potential between two groups  $a$  and  $b$  is given by

$$V_{\text{el}}^{(a,b)} = \frac{e^2 N_A}{4\pi\epsilon_0} \frac{s_a s_b}{g(a,g(b))} \sum_{\substack{i \in a \\ j \in b}} \frac{q_i q_j}{r_{ij}},$$

where  $i, j$  represent the atoms included in the force field,  $q_i$  and  $q_j$  are the corresponding partial charges,  $r_{ij}$  is the distance between these atoms,  $g(a, g(b))$  are group-specific dielectric constants,  $e$  is the electron charge,  $N_A$  is the Avogadro number,  $\epsilon_0$  is the electric constant. The group specific parameter  $s_a$  is equal to 1 for the uncharged groups and is proportional to the relative solvent accessible surface for charged groups:

$$s_a = \frac{4}{A_{a,\max}} \sum_{i \in a} A_i,$$

where  $A_i$  is the solvent accessible surface area of atom  $i$  and the values of the parameter  $A_{a,\max}$  are given in Table 3.

| Group type                 | ARG | ASP | GLU | HIS | LYS |
|----------------------------|-----|-----|-----|-----|-----|
| $A_{a,\max}, \text{\AA}^2$ | 168 | 105 | 117 | 143 | 135 |

Table 3. Parameters  $A_{a,\max}$  for the charged groups.

The group specific dielectric constants are chosen according to different types of electrostatic interaction. This represents the characteristics of the atoms as being part of different amino acids and takes their specific partial charges, orientation or accessibility to the solvent into account. This is a strong approximation to the real environment, as only the interacting amino acids and not the complete environment is taken into consideration. The group indices  $g(a)$  and  $g(b)$  are given in Table 1, the parameters  $\epsilon_{g(a)g(b)}^{-1} = \epsilon_{g(b)g(a)}^{-1}$  are given in Table 4. This parameterization excludes some parts or even complete side chains (like PHE, GLY, MET, PRO) from contributions to the electrostatics.

|            | $g(b) = 1$ | $g(b) = 2$ | $g(b) = 3$ | $g(b) = 4$ | $g(b) = 5$ | $g(b) = 6$ |
|------------|------------|------------|------------|------------|------------|------------|
| $g(a) = 1$ | 0.103      | 0.103      | 0.000      | 0.287      | 0.287      | 0.086      |
| $g(a) = 2$ |            | 0.103      | 0.324      | 0.287      | 0.287      | 0.062      |
| $g(a) = 3$ |            |            | 0.000      | 0.000      | 0.324      | 0.091      |
| $g(a) = 4$ |            |            |            | 0.287      | 0.287      | 0.086      |
| $g(a) = 5$ |            |            |            |            | 0.287      | 0.062      |
| $g(a) = 6$ |            |            |            |            |            | 0.050      |

Table 4: Parameters for the inverse group specific dielectric constants  $\epsilon_{g(a)g(b)}^{-1} = \epsilon_{g(b)g(a)}^{-1}$ . For  $a, b = 7$ ,  $\epsilon_{g(a)g(b)}^{-1} = 0$ . For CO and NH groups belonging to the same peptide bond,  $\epsilon^{-1} = 0$ .

The parameters for  $g(i) = 1, 2$  are used to describe the hydrogen bonding for the main chain as dipole-dipole interaction and constitute the biggest contribution from electrostatics.  $g(i) = 3, 4, 5$  describe interactions of the partially charged OH, CO and NH<sub>2</sub> groups of the (ASN, GLN, SER, THR, TRP)-sidechains, which are smaller in their contributions. The interaction of the charged COO<sup>-</sup> and NH<sup>(+)</sup> x of (ASP, GLU, ARG, LYS, HIS, TRP) are the smallest contributions to the electrostatic interaction. The electrostatics of the sidechains contribute only in minor quantities to the total free energy of the protein.

The total electrostatic energy is the sum over all pairs of groups:

$$V_{\text{el}} = \sum_{a,b} V_{\text{el}}^{(a,b)}.$$

### 3. Hydrogen bonding

The interaction partners are the CO and NH groups of the backbone (not the groups END, NTM and PRO). NH can have only one partner. CO can have two partners on the opposite sides of the plane C CO. The groups belonging to neighboring (and the same) residues cannot be partners.

In addition to the pure electrostatic term identical to that described in the previous section, the interaction between partners is characterized by another term, which approximates the chemical energy of a hydrogen bond. It is defined by the following parameters:  $\theta$ , the angle between the vectors  $\vec{\text{HN}}$  and  $\vec{\text{OH}}$  (degrees);  $\alpha$ , the angle between the vectors  $\vec{\text{CO}}$  and  $\vec{\text{HN}}$  (degrees);  $r$ ; the distance between H and O (Å). The interaction energy for two partners is given by

$$V_{\text{hb}}^{(p)} = V_{\text{hb}}^{(0)} \tanh \left[ 1.1 s_{2.4;0.075}(r) s_{45;5}(\alpha) s_{40;5}(\beta) s_{1;0.05} \left( \sqrt{\left(\frac{\alpha}{45}\right)^2 + \left(\frac{\beta}{35}\right)^2} \right) \right]$$

where  $V_{\text{hb}}^{(0)} = -2.89$  kcal/mole and

$$s_{A,B}(x) = \frac{1}{2} \left( 1 - \tanh \left( \frac{x-A}{B} \right) \right).$$

The groups CO and NH are considered to be partners if the distance  $r$  does not exceed 3.3 Å. In case when more group pairs than allowed satisfy this criterion, the pair with the lowest interaction energy has the preference. The total hydrogen bonding energy is the sum of the energies of all pairs of partners.

### 4. Solvation Effect

In PFF02 solvent interaction is modelled by calculating the solvent accessible surface area (SASA) of each atom of the protein. The contribution from solvent is then given by

$$V_{solvent} = \sum_j k_j \text{PT}(j) A_j$$

with

$$A_j = 4\pi \left( \frac{R_{ij}}{2} + r_w \right)^2 p_j,$$

where,  $i$  counts all atoms,  $\text{PT}(j)$  is the potential type of atom  $j$ ,  $\text{PT}(j)$  gives the atomic solvent parameter (ASP) according to potential type and  $A_j$  gives the solvent accessible surface area (SASA) of atom  $j$ . The parameter  $p_j$  is the part of the extended surface of atom  $j$  that is not within the extended surface of any other atom. "Extended" means that the atom radius  $R_{ij}/2$  is extended by the "water radius"  $r_w = 1.4 \text{ \AA}$ .

The coefficient  $k_j$  is a scaling factor defined as follows. Its "basic" value is 1.0. Then it is multiplied:

- by 0.70 for the atoms of the terminal residues;
- additionally by 0.70 for the atoms in the groups NTM and END;
- by 0.80 for the side chain atoms of ALA, ILE, PRO, VAL;
- by 0.64 for the side chain atoms of LEU, MET;
- by 0.96 for the side chain atoms of PHE;
- by 0.60 for the side chain atoms of TRP;
- by 0.80 for the side chain atoms of type *cme*;
- by 2.00 for the side chain atoms of type *mw*;
- by 0.8 for all backbone atoms.

The parameters  $\text{PT}$  are calculated using the above equation to fit the experiment. The parameters  $R_{ij}$  and  $\text{PT}$  are given in Table 2.

## 5. Local Electrostatics

Local electrostatics is defined as the electrostatic energy of the main chain CO and NH groups of a residue  $n$  arising from the interactions with main chain CO and NH groups within that residue and with the adjoining peptide groups (for the residue PRO the group PRO is taken instead of NH). Thus for  $(\text{NH})_n$  interactions are calculated for  $(\text{CO})_{n-2}$ ,  $(\text{NH})_{n-1}$ ,  $(\text{CO})_n$  and  $(\text{NH})_{n+1}$  and for  $(\text{CO})_n$  the interactions are calculated for  $(\text{CO})_{n-1}$ ,  $(\text{NH})_n$ ,  $(\text{CO})_{n+1}$  and  $(\text{NH})_{n+2}$ . For group  $a$  belonging to residue  $n$  the interaction energy is

$$V_{\text{loc}}^{(a)} = \frac{e^2 N_A}{4\pi\epsilon_0} \frac{1}{2} \sum_b \sum_{\substack{j \in a \\ j \in b}} \frac{q_i q_j}{r_{ij}}$$

where  $q_i$  is the charge of atom  $i$ ,  $r_{ij}$  is the distance between the atoms  $i$  and  $j$ , and the parameter  $n$  is an

amino acid specific parameter given in Table 5. The summation  $\sum_b$  is performed over all partners of group  $a$ , except PRO. The total energy of local interaction is (summation over all groups CO, NH, PRO)

$$V_{\text{loc}} = \sum_a V_{\text{loc}}^{(a)}$$

| Residue |       | Residue |      | Residue |      | Residue |      |
|---------|-------|---------|------|---------|------|---------|------|
| ALA     | 0.17  | GLU     | 0.11 | LEU     | 0.29 | SER     | 0.17 |
| ASP     | -0.01 | GLN     | 0.21 | LYS     | 0.19 | THR     | 0.18 |
| ASN     | 0.11  | GLY     | 0.12 | MET     | 0.34 | TRP     | 0.21 |
| ARG     | 0.22  | HIS     | 0.21 | PHE     | 0.37 | TYR     | 0.28 |
| CYS     | 0.23  | ILE     | 0.43 | PRO     | 0.00 | VAL     | 0.40 |

Table 5: Amino acid specific parameters for local electrostatic interaction.

## Dihedral Angle Term

The dihedral angle term for residue  $n$  is defined as

$$V_{\text{tor}}^{(n)} = -0.6 \exp \left[ -0.005(\phi_n + 110)^2 - 0.00125(\phi_n - 130)^2 \right], \text{ kcal/mole .}$$

Here  $\phi_n$  and  $\psi_n$  are the backbone dihedral angles (degrees). For GLY, PRO and terminal residues,  $V_{\text{tor}}^{(n)} = 0$ . The entire term for the whole chain is (summation over all residues)

$$V_{\text{tor}} = \sum_a V_{\text{tor}}^{(a)}$$
